# Relative Patlak Plot for Dynamic PET Parametric Imaging Without the Need for Early-time Input Function

Yang Zuo<sup>1</sup>, Jinyi Qi<sup>2</sup>, Guobao Wang<sup>1,3</sup>

1. Department of Radiology, 2. Department of Biomedical Engineering, 3. Cancer Center, University of California at Davis

E-mail: [gbwang@ucdavis.edu](mailto:gbwang@ucdavis.edu)

**Abstract.** The Patlak graphical method is widely used in parametric imaging for modeling irreversible radiotracer kinetics in dynamic PET. The net influx rate of radiotracer can be determined from the slope of the Patlak plot. The implementation of the standard Patlak method requires the knowledge of full-time input function from the injection time until the scan end time, which presents a challenge for use in the clinic. This paper proposes a new relative Patlak plot method that does not require early-time input function and therefore can be more efficient for parametric imaging. Theoretical analysis proves that the effect of early-time input function is a constant scaling factor on the Patlak slope estimation. Thus, the parametric image of the slope of the relative Patlak plot is related to the parametric image of standard Patlak slope by a global scaling factor. This theoretical finding has been further demonstrated by computer simulation and real patient data. The study indicates that parametric imaging of the relative Patlak slope can be used as a substitute of parametric imaging of standard Patlak slope for certain clinical tasks such as lesion detection and tumor volume segmentation.

## 1. Introduction

Dynamic positron emission tomography (PET) provides four-dimensional distribution (three-dimensional space plus one-dimensional time) of radiotracer in living body and is attracting more and more research interests [Schmidt and Turkheimer, 2002, Rahmim et al, 2009, Wang and Qi, 2013, Reader and Verhaeghe, 2014]. Analyzing dynamic PET data relies on kinetic modeling which commonly uses a temporal model to describe the kinetics of radiotracer uptake [Schmidt and Turkheimer, 2002]. Voxel-wise implementation of kinetic modeling provides parametric maps of kinetic parameters indicating the biological characters of the tissue [Gunn et al., 1998]. Parametric imaging has been found useful in many applications including tumor detection [Kordower et al., 2000, Gill et al., 2003] and extraction of metabolic tumor volume (MTV) [Visser et al., 2008].

The Patlak graphical plot is a widely used kinetic analysis method in dynamic PET for extracting the net influx rate of irreversible uptake of a radiotracer [Patlak et al., 1983, Patlak and Blasberg, 1985]. It is also used for kinetic modeling in dynamic magnetic resonance imaging (MRI) [Hackstein et al., 2003] and computed tomography (CT)

[Hackstein et al., 2004, Miles et al., 1999, Hom et al., 2009]. Compared with nonlinear compartmental modeling, the Patlak method uses a linear model and has the advantage of being computationally efficient for parametric imaging and being easier to be implemented into new reconstruction methods [Wang et al., 2008, Tsoumpas et al., 2008, Tang et al., 2010, Angelis et al., 2011, Zhu et al., 2013] and for whole-body imaging [Karakatsanis et al., 2015, Karakatsanis et al., 2016, Zhu et al., 2013, Hu et al., 2017].

Input function is essential for tracer kinetic modeling. Although the Patlak graphical plot only examines the time points of tissue activity at steady state, the standard Patlak method requires the knowledge of full-time input function from the radiotracer injection time until the dynamic scan end time. To obtain the information of full-time input function, either many blood samples are needed if arterial blood sampling is used or a long scan covering early-time points is required if the image-derived or reference region input function is used. For example in dynamic  $^{18}\text{F}$ -FDG PET imaging, an one-hour dynamic scan is required to derive the full blood input function from dynamic images, though only late 20-30 minutes are actually used to extract the tracer activity of tissue. This requirement for early-time input function presents a challenge for applying the Patlak method in the clinic, particularly for whole-body imaging [Hu et al., 2017].

This paper proposes a new relative Patlak plot method for PET parametric imaging. Compared with the standard Patlak plot, the proposed relative plot does not require the information of early-time input function. Mathematical analysis is used to show the relationship between the slope of the new plot and that of the standard Patlak plot. The theoretical findings are further validated by computer simulation of dynamic PET data and real patient scan data.

## 2. Theory

### 2.1. Standard Patlak Plot

Let us denote the radiotracer concentration at time  $t$  in a tissue region of interest (ROI) or voxel by  $C_T(t)$  and tracer concentration in the plasma by  $C_P(t)$ . The Patlak plot exploits the linearity between the normalized tissue concentration and normalized integral of input function  $C_P(t)$  after a steady-state time  $t^*$ . Mathematically, it is described by a linear equation:

$$\frac{C_T(t)}{C_P(t)} = K_i \cdot \frac{\int_0^t C_P(\tau) d\tau}{C_P(t)} + b \quad (t > t^*), \quad (1)$$

where  $K_i$  is the slope constant that represents the net influx rate of irreversible uptake of a radiotracer and  $b$  is the intercept which equivalently indicates blood volume in the tissue and the normalized tracer concentration from reversible compartments.

By acquiring dynamic PET data for multiple time frames, one can plot the data of

$$y(t) = \frac{C_T(t)}{C_P(t)} \quad (2)$$

and

$$x(t) = \frac{\int_0^t C_P(\tau) d\tau}{C_P(t)} \quad (3)$$

of each time frame and fit the data points using the linear model Eq. (1). The slope  $K_i$  and intercept  $b$  are then estimated by the linear regression. Note that although  $y(t)$  is only sampled for  $t > t^*$ ,  $x(t)$  contains the integral of the input function  $C_P(t)$  from the injection time  $t = 0$  till the scan end time. Thus the full-time input function needs to be known for the standard Patlak plot.

Given a set of measurements at  $M$  time points  $\{t_m\}_{m=1}^M$  with  $t_1 = t^*$ , the Patlak slope and intercept can be estimated using the following least-squares formulation,

$$\hat{K}_i, \hat{b} = \arg \min_{K_i, b} \sum_{m=1}^M [y(t_m) - K_i \cdot x(t_m) - b]^2. \quad (4)$$

The optimal solution has the following analytic formula

$$\hat{K}_i = \frac{V(x, y)}{V(x, x)}, \quad (5)$$

$$\hat{b} = \bar{y} - \hat{K}_i \cdot \bar{x}, \quad (6)$$

where  $V(\cdot, \cdot)$  and  $\bar{\cdot}$  have the forms as follows

$$\bar{x} = \frac{1}{M} \sum_{m=1}^M x(t_m), \quad (7)$$

$$V(x, y) = \frac{1}{M} \sum_{m=1}^M x(t_m)y(t_m) - \bar{x} \cdot \bar{y}, \quad (8)$$

which correspond to the mean and covariance if  $x$  and  $y$  are considered as random variables.

## 2.2. Proposed Relative Patlak Plot

We propose a new relative Patlak plot which has the following model equation:

$$\frac{C_T(t)}{C_P(t)} = K'_i \cdot \frac{\int_{t^*}^t C_P(\tau) d\tau}{C_P(t)} + b' \quad (t > t^*), \quad (9)$$

where  $K'_i$  and  $b'$  are the slope and intercept of the new plot, respectively.

The new relative Patlak method plots the data of  $y(t)$  in Eq. (2) versus

$$x'(t) = \frac{\int_{t^*}^t C_P(\tau) d\tau}{C_P(t)} \quad (10)$$

to get the slope  $K'_i$  and intercept  $b'$ . This new model is very similar to the standard Patlak plot equation, except that the integral of the input function  $C_P(t)$  here is from  $t^*$  to  $t$ , not from 0 to  $t$ . The integral of  $C_P(t)$  over early time from 0 to  $t^*$  is no longer needed in this new plot.

Similarly to the least-squares estimation for the standard Patlak plot, the slope and intercept of the relative Patlak plot can be estimated by

$$\hat{K}'_i, \hat{b}' = \arg \min_{K'_i, b'} \sum_{m=1}^M [y(t_m) - K'_i \cdot x'(t_m) - b']^2, \quad (11)$$

which gives the following optimal solution

$$\hat{K}'_i = \frac{V(x', y)}{V(x', x')}, \quad (12)$$

$$\hat{b}' = \bar{y} - \hat{K}'_i \cdot \bar{x}'. \quad (13)$$

where  $\bar{\cdot}$  and  $V(\cdot, \cdot)$  are defined in Eqs. (7) and (8), respectively.

### 2.3. Theoretical Relation Between the Two Plots

The new relative Patlak plot is closely related to the standard Patlak plot. Here we examine the theoretical relation between the two plots using analytical derivations. Let us define

$$x^0(t) = \frac{\int_0^{t^*} C_P(\tau) d\tau}{C_P(t)} \quad (14)$$

to account for the component of early-time input function which appears in  $x(t)$  but not in  $x'(t)$ . Obviously, we have

$$x(t) = x^0(t) + x'(t). \quad (15)$$

Without loss of generality in dynamic PET, the late-time input function  $C_P(t)$  for  $t > t^*$  can be analytically expressed by an exponential function:

$$C_P(t) = a_1 \cdot e^{-a_2 t}, \quad (16)$$

where  $a_1, a_2 > 0$ . For example, the widely used Feng model [Feng et al., 1993] has the form

$$C_P(t) = (A_1 t - A_2 - A_3) e^{-L_1 t} + A_2 e^{-L_2 t} + A_3 e^{-L_3 t}, \quad (17)$$

with the following parameters  $A_1 = 851.1$  mg/100mL/min,  $A_2 = 20.8$  mg/100mL,  $A_3 = 21.9$  mg/100mL,  $L_1 = 4.1$  min<sup>-1</sup>,  $L_2 = 0.01$  min<sup>-1</sup>,  $L_3 = 0.12$  min<sup>-1</sup>. For  $t > t^* = 30$  minutes, the Feng input function is dominated by the term  $A_2 e^{-L_2 t}$  while the other two terms are negligible. As a result,  $x^0(t)$  and  $x'(t)$  can be rewritten as

$$x^0(t) = \frac{s^*}{a_1} e^{a_2 t}, \quad (18)$$

$$x'(t) = \frac{1}{a_2} \left( a_1 e^{-a_2(t^* - t)} - 1 \right), \quad (19)$$

with  $s^*$  being the integral of blood input over the early time from time 0 to  $t^*$ ,

$$s^* = \int_0^{t^*} C_P(\tau) d\tau. \quad (20)$$

It is then not difficult to verify the following linear relationship between  $x^0(t)$  and  $x'(t)$ :

$$x^0(t) = \alpha + \beta x'(t) \quad (21)$$

where  $\alpha$  and  $\beta$  are both constants that only depend on  $t^*$ :

$$\alpha = \frac{1}{a_1} s^* e^{a_2 t^*}, \quad (22)$$

$$\beta = \frac{a_2}{a_1} s^* e^{a_2 t^*}. \quad (23)$$

Using Eq. (15), the standard Patlak plot model Eq. (1) can be re-written as

$$y(t) = K_i \cdot [x'(t) + x^0(t)] + b. \quad (24)$$

Substituting Eq. (21) into Eq. (24), we obtain the following equivalence,

$$y(t) = (1 + \beta)K_i \cdot x'(t) + (\alpha K_i + b), \quad (25)$$

$$= K'_i x'(t) + b' \quad (26)$$

with

$$K'_i = (1 + \beta)K_i, \quad (27)$$

$$b' = b + \alpha K_i. \quad (28)$$

The two equations above indicate that the relative Patlak slope  $K'_i$  is proportional to the standard Patlak slope  $K_i$  with a scaling factor  $(1 + \beta)$ . The intercept of the relative Patlak plot is equivalent to the intercept of the standard Patlak plot plus a shift  $\alpha K_i$ .

The scaling factor  $(1 + \beta)$  only depends on the input function and is independent of tissue time activity. It is therefore a global scaling factor when the Patlak plot is implemented for parametric imaging. Thus, the parametric image of the relative Patlak slope  $K'_i$  is equivalent to the parametric image of the standard Patlak slope  $K_i$  up to a scaling factor.

#### 2.4. Theoretical Relation Between the Least Squares Estimates

In practice, the slope and intercept of a graphical plot are commonly estimated by a least squares optimization. Here we examine the theoretical relation between the standard Patlak and relative Patlak least squares estimates.

Based on Eq. (21),  $x(t)$  and  $x'(t)$  approximately satisfy a linear relation:

$$x(t) = \nu + S \cdot x'(t) \quad (t > t^*), \quad (29)$$

where  $S$  and  $\nu$  are respectively equivalent to  $(1 + \beta)$  and  $\alpha$  if the late-time blood input is described by an exponential function. Alternatively,  $S$  and  $\nu$  can be estimated by a linear regression without assuming an exponential model:

$$S = \frac{V(x', x)}{V(x', x')}, \quad (30)$$

$$\nu = \bar{x} - S \cdot \bar{x}'. \quad (31)$$

Substituting Eq. (29) into the least squares estimate of the standard Patlak slope  $\hat{K}_i$  in Eq. (5) leads to the following expression,

$$\hat{K}_i = \frac{V(\nu + Sx', y)}{V(\nu + Sx', \nu + Sx')}. \quad (32)$$

Note that the function  $V(\cdot, \cdot)$  has the following properties:

$$V(x, y) = V(y, x), \quad (33)$$

$$V(c \cdot x, y) = c \cdot V(x, y), \quad (34)$$

$$V(x + c, y) = V(x, y), \quad (35)$$

where  $c$  is an arbitrary constant. Using these properties and the definition of the least-squares estimate of the relative Patlak slope  $\hat{K}'_i$  defined in Eq. (12), we then obtain the scaling relation between  $\hat{K}'_i$  and  $\hat{K}_i$ :

$$\hat{K}'_i = S \cdot \hat{K}_i. \quad (36)$$

We can also derive the following relation between the least-squares estimates of the two intercepts  $\hat{b}'$  and  $\hat{b}$ :

$$\hat{b}' = \hat{b} + \nu \cdot \hat{K}_i. \quad (37)$$

These results indicate that the theoretical relation between the standard Patlak plot and relative Patlak plot holds true for their least squares estimation.

### 3. Materials and Methods

#### 3.1. Validation Using Computer Simulation

We first conducted a computer simulation to validate the theoretical results on the scaling relationship between the standard Patlak slope and relative Patlak slope. One-hour dynamic  $^{18}\text{F}$ -FDG scan was simulated following the scanning sequence of a total of 55 frames:  $30 \times 10$ -second frames,  $10 \times 60$ -second frames and  $15 \times 180$ -second frames. The blood input function in this simulation was generated using the analytical Feng model [Feng et al., 1993]. Following the standard two-tissue compartmental model, we simulated 10,000 groups of random kinetic parameters which follow a Gaussian distribution with the mean of kinetic parameters being  $K_1 = 0.81$  mL/mL/min,  $k_2 = 0.38$  min $^{-1}$ ,  $k_3 = 0.1$  min $^{-1}$ ,  $k_4 = 0$  min $^{-1}$  and standard deviation being 40% of the mean kinetic parameters. Noise-free time activity curves (TACs) were generated with the simulated FDG kinetics and blood input function. Zero-mean Gaussian noise were then added to each noise-free TAC  $\{c_m\}_{m+1}^M$  using the noise standard deviation [Wu and Carson, 2002] defined by

$$SD_m = S_c \cdot \sqrt{c_m \exp(\lambda t_m) / \Delta t_m}, \quad (38)$$

where  $S_c$  is a scale factor to adjust  $SD$  to match with realistic dynamic FDG-PET data at different noise levels.  $S_c = 1.0$  was used to simulate a voxel-level high noise in this simulation.  $\lambda$  is the decay constant of the radiotracer set to be  $\ln(2)/T_{1/2}$  with  $T_{1/2} = 109.8$  minutes.  $\Delta t_m$  is the scan duration of time frame  $m$  and  $t_m$  is the middle time of frame  $m$ .

#### 3.2. Validation Using Patient Scans

We further validated the theoretical results using dynamic FDG-PET scans of two human patients, one with breast cancer and the other with coronary heart disease.

The breast patient scan was operated on the GE Discovery 690 PET/CT scanner at UC Davis Medical Center. The patient received 5 mCi  $^{18}\text{F}$ -FDG with a bolus injection. List-mode time-of-flight data acquisition commenced right after the FDG injection and lasted for 60 minutes. A low-dose transmission CT scan was then performed at the end of PET scan to provide CT image for PET attenuation correction. The raw data were then binned into a total

## Relative Patlak Plot for Parametric Imaging

7

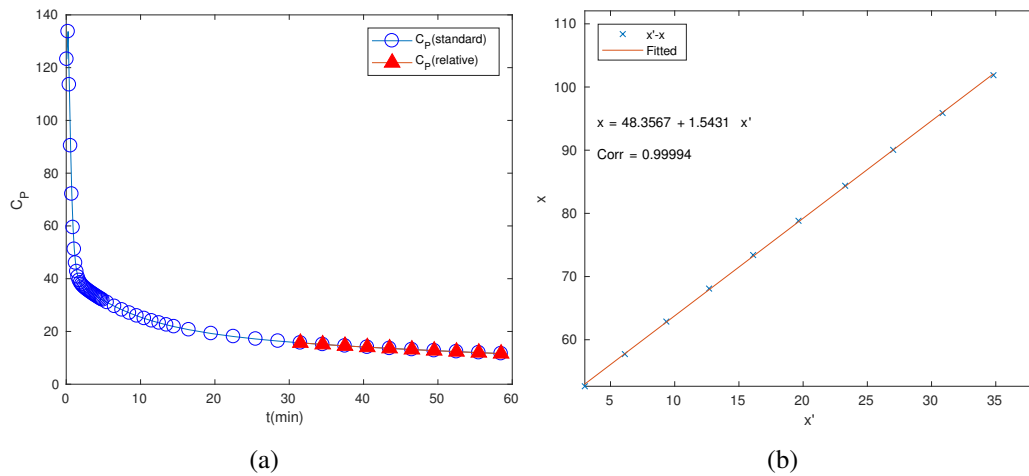

**Figure 1.** Blood input functions in the simulation. (a) Full-time blood input function (circles) for the Standard Patlak and late time points (solid triangles) for the relative Patlak; (b) Linear relation between  $x$  and  $x'$  with  $t^* = 30$  minutes.

of 49 dynamic frames:  $30 \times 10$  seconds,  $10 \times 60$  seconds and  $9 \times 300$  seconds. Dynamic PET images were reconstructed using the standard ordered subsets expectation maximization (OSEM) algorithm with 2 iterations and 32 subsets as provided in the vendor software. All data corrections including normalization, attenuation correction, scattered correction and randoms correction, were included in the reconstruction process. A region of interest was placed in the left ventricle region to extract blood input function.

The cardiac scan was performed on the GE Discovery ST PET/CT scanner at UC Davis Medical Center in two-dimensional mode. The scanner has no time-of-flight capability. The patient received 10 mCi  $^{18}\text{F}$ -FDG with a bolus injection. List-mode data acquisition commenced right after the FDG injection and lasted for 60 minutes. A low-dose transmission CT scan was then performed at the end of PET scan to provide CT image for PET attenuation correction. The raw data were binned into a total of 49 dynamic frames:  $30 \times 10$  seconds,  $10 \times 60$  seconds and  $9 \times 300$  seconds. Dynamic PET images were reconstructed using the standard ordered subsets expectation maximization (OSEM) algorithm with 2 iterations and 30 subsets as provided in the vendor software. All data corrections including normalization, attenuation correction, scattered correction and randoms correction, were included in the reconstruction process. The blood input function was also extracted from the left ventricle region.

## 4. Results

### 4.1. Simulation Results

The simulated noisy TACs were first analyzed using the standard Patlak plot and new relative Patlak plot with a start time  $t^* = 30$  minutes. For the standard Patlak plot, the full-time blood input from 0 to 60 minutes was used to estimate the slope  $K_i$ . For the relative Patlak plot, only the input function after  $t^*$  was used to estimate the slope  $K'_i$ . Early-time input function



## Relative Patlak Plot for Parametric Imaging

8

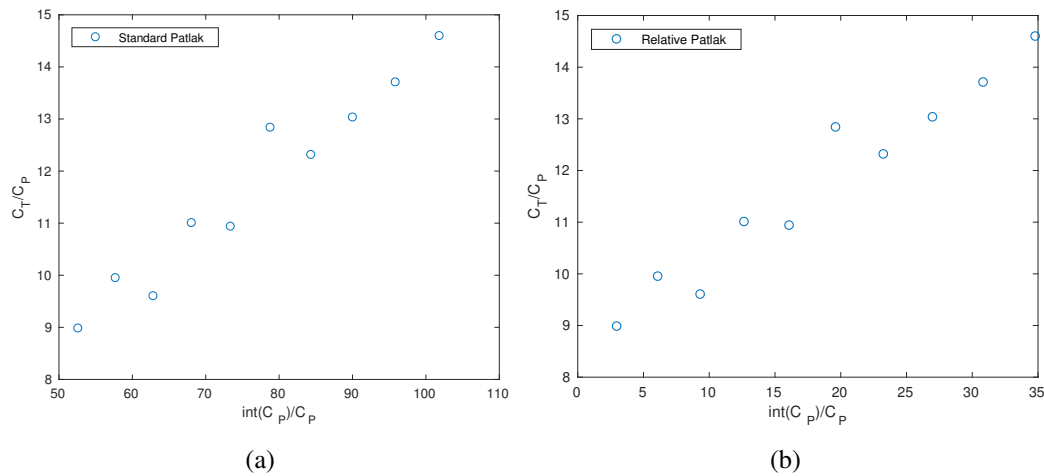

**Figure 2.** Comparison of the standard Patlak plot and relative Patlak plot in the simulation. (a) standard Patlak plot; (b) relative Patlak plot.

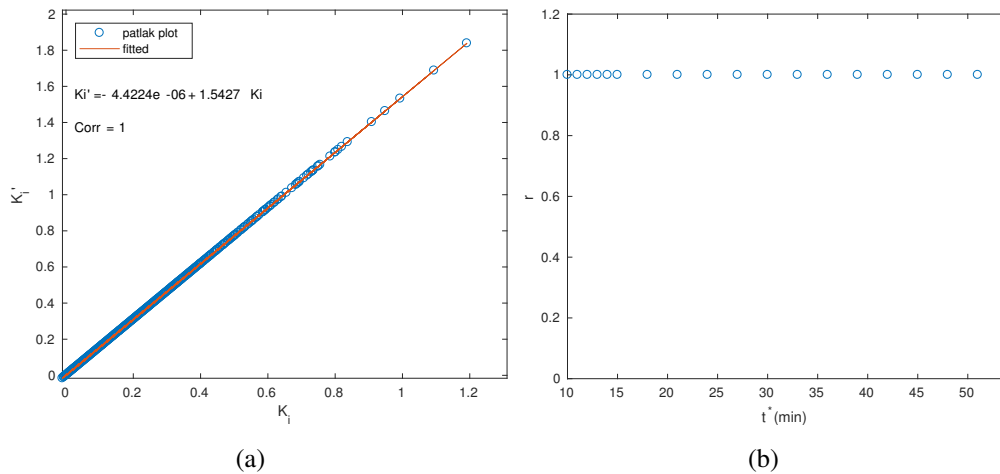

**Figure 3.** Results of simulation. (a) Relation between  $K'_i$  and  $K_i$ ; (b) Correlation coefficient of  $K'_i$  versus  $K_i$  for various  $t^*$  values.

is not needed for the relative Patlak plot, which is equivalent to setting those time points to zeros. The two input functions are graphically compared in Fig. 1(a). We then verified the linear relation between  $x(t) = (\int_0^t C_P(\tau)d\tau)/C_P(t)$  and  $x'(t) = (\int_{t^*}^t C_P(\tau)d\tau)/C_P(t)$  with  $t > t^*$ . Figure 1(b) shows the plot of  $x(t)$  versus  $x'(t)$  for the simulated Feng input function. The linear fit was excellent with a pairwise linear correlation coefficient close to 1.

Examples of the the standard Patlak plot and relative Patlak plot are shown in Fig. 2 (a) and (b). We examined the linearity between the standard Patlak slope  $K_i$  and the relative Patlak slope  $K'_i$ . Fig. 3(a) shows the estimated  $K'_i$  versus  $K_i$  values for all the simulated 10,000 TACs. The correlation coefficient between  $K'_i$  and  $K_i$  was 1.0, indicating a perfect linearity. The intercept is negligible, indicating  $K'_i$  values are equal to  $K_i$  values times the scaling factor. The slope of the linear plot of  $K'_i$  versus  $K_i$  is approximately equal to the slope of the linear plot of  $x(t)$  versus  $x'(t)$ . The relation between  $K'_i$  and  $K_i$  is therefore verified by the simulation data. Fig. 3(b) further shows that the correlation coefficient between  $K'_i$  and



## Relative Patlak Plot for Parametric Imaging

9

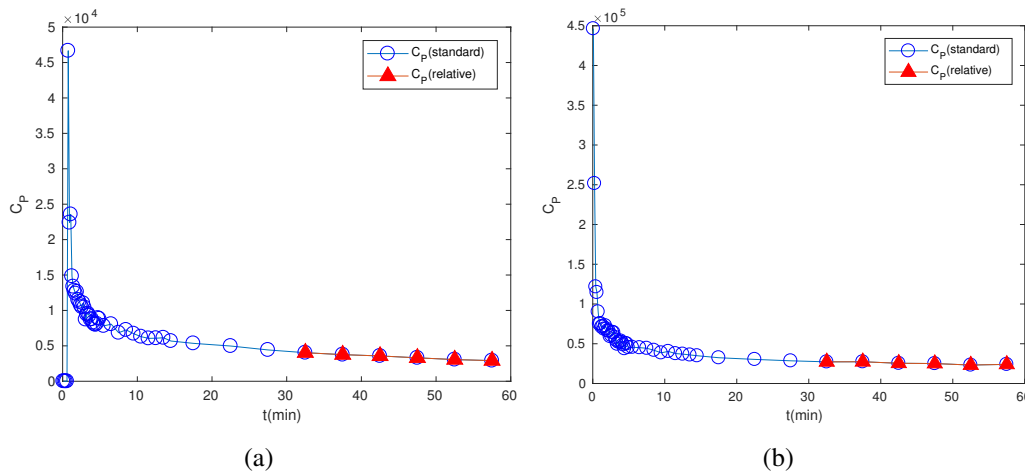

**Figure 4.** Blood input functions from dynamic FDG-PET scans of human patients. (a) breast cancer patient; (b) cardiac patient.

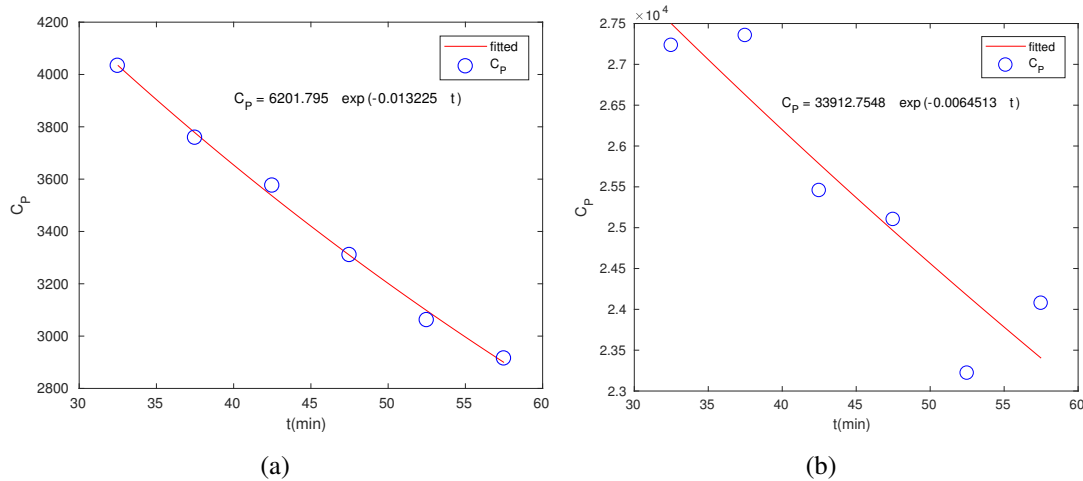

**Figure 5.** Validation of late-time points of real patient blood input functions fitted by an exponential function. (a) breast patient data, (b) cardiac patient data.

$K_i$  remains stable and close to 1 when  $t^*$  varied from 10 minutes to 54 minutes, though the scaling factor between them depends on  $t^*$ . Note that  $t^*$  could not be greater than 54 minutes given the defined time frames, otherwise less than two time points could be used for the Patlak plots.

### 4.2. Patient Results

**4.2.1. Blood Input Functions** The image-derived input functions from the breast patient scan and cardiac patient scan are shown in Fig. 4(a) and Fig. 4(b), respectively. The start time  $t^*$  was initially set to 30 minutes. Fig. 5 validates that the late-time time points of the two blood input functions can be fitted with the one-exponential function  $C_P(t) = a_1 e^{-a_2 t}$  for  $t \geq t^*$ . It is not surprising that higher noise presents in the cardiac patient data because the scan was operated in a 2D mode and also without time-of-flight capability.

## Relative Patlak Plot for Parametric Imaging

10

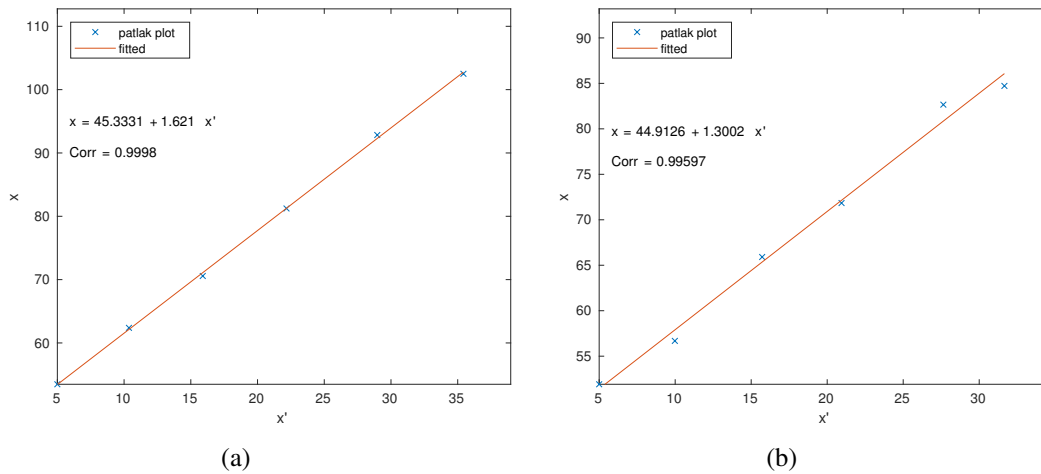

**Figure 6.** Linear relation between  $x(t)$  and  $x'(t)$  for patient data with  $t \geq t^* = 30$  minutes. (a) breast patient data, (b) cardiac patient data.

The linear relation between  $x(t)$  and  $x'(t)$  after  $t^* = 30$  minutes is shown in Fig. 6(a) for the breast patient data and in Fig. 6(b) for the cardiac patient data.

**4.2.2. Breast Patient Result** The parametric maps of  $K_i$  by the standard Patlak model and  $K'_i$  by the relative Patlak model are shown in Fig. 7 for transverse, sagittal and coronal planes. These two parametric images have different absolute values but they appear to be proportional to each other. The plot of  $K'_i$  versus  $K_i$  is shown in Fig. 8(a). It is clear that  $K'_i$  was linearly related to  $K_i$  with a slope of 1.6199 and intercept of  $1.7345 \times 10^{-7}$ . The intercept was negligible so the linear relation was simply a scaling. The slope of the linear plot of  $K'_i$  versus  $K_i$  is very close to the slope of the linear plot of  $x(t)$  versus  $x'(t)$ . The correlation coefficients between  $K'_i$  and  $K_i$  was close to 1. Fig. 8(b) further shows the correlation coefficient between  $K'_i$  and  $K_i$  versus various  $t^*$  values ranging from 10 minutes to 50 minutes. High correlation remains between  $K'_i$  and  $K_i$ .

**4.2.3. Cardiac Patient Result** The parametric maps of  $K_i$  by the standard Patlak model and  $K'_i$  by the relative Patlak model with  $t^* = 30$  minutes are shown in Fig. 9. Again, the two parametric images appear to be proportional to each other, though with different absolute values. The plot of  $K'_i$  versus  $K_i$  is shown in Fig. 10(a). It is again clear that  $K'_i$  was linearly related to  $K_i$  with a slope of 1.2898 and intercept of  $7.7 \times 10^{-6}$ . The negligible intercept indicates that the linear relation was a scaling. The slope of plotting  $K'_i$  versus  $K_i$  was very close to the slope 1.3022 of plotting  $x(t)$  versus  $x'(t)$ . The correlation coefficients between  $K'_i$  and  $K_i$  and between  $x(t)$  and  $x'(t)$  are close to 1.

The correlation coefficient between  $K'_i$  and  $K_i$  is further plotted versus the start time  $t^*$  in Fig. 10(b). The correlation coefficient values remain above 0.90, though the one at  $t^* = 45$  minutes is slightly lower than others. This can be explained by the fact in Fig. 6(b) that the linear correlation between  $x$  and  $x'$  for  $t^* = 45$  minutes (i.e., the last three points) is relatively weaker, possibly due to higher noise in the cardiac scan. The corresponding  $K_i$  and

Relative Patlak Plot for Parametric Imaging

11

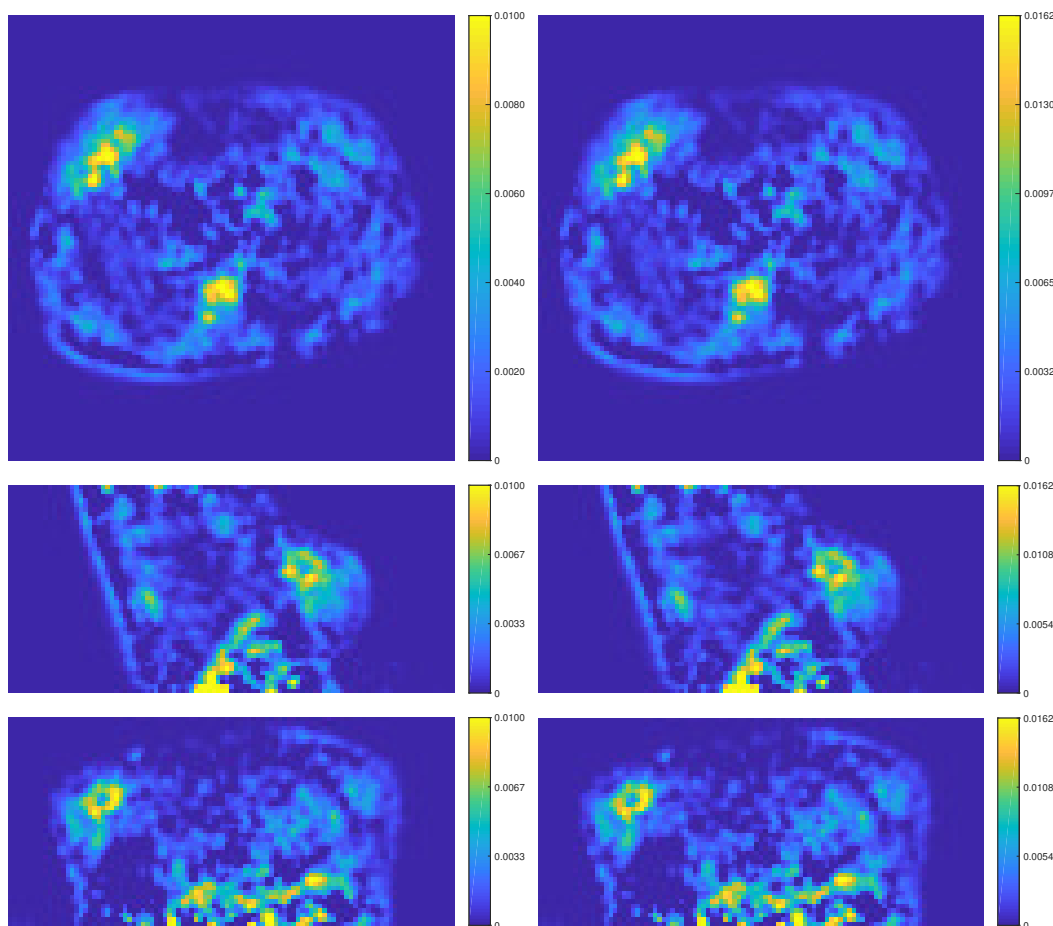

**Figure 7.** Comparison of parametric imaging using the standard Patlak plot and relative Patlak plot for the breast patient. Left: parametric image of the standard Patlak slope  $K_i$ ; Right: parametric image of the relative Patlak slope  $K_i'$ . The start time  $t^* = 30$  minutes. From the top to the bottom are the views from the planes of transverse, sagittal and coronal, respectively.

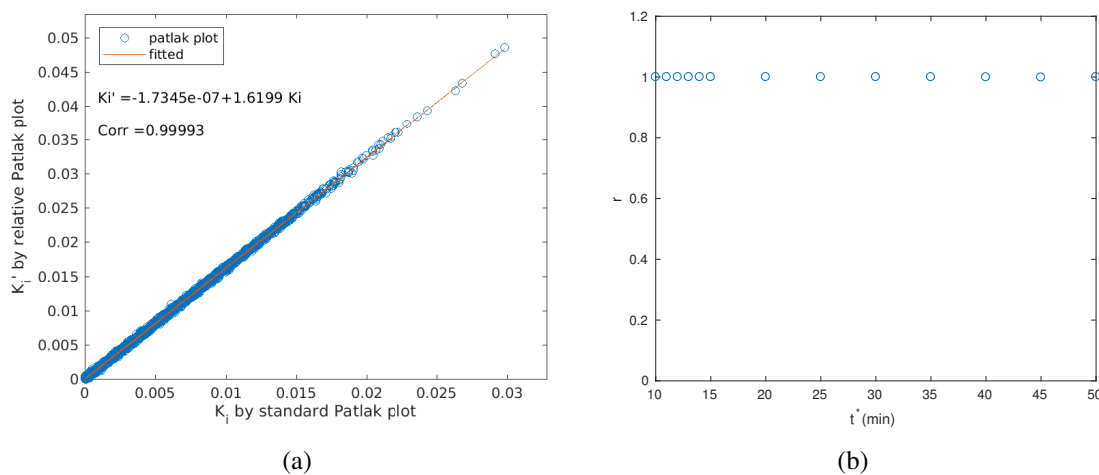

**Figure 8.** Results of the breast patient scan. (a) Relation between  $K_i'$  and  $K_i$  ( $t^* = 30$  minutes); (b) Correlation coefficient between  $K_i'$  and  $K_i$  versus various start time  $t^*$ .

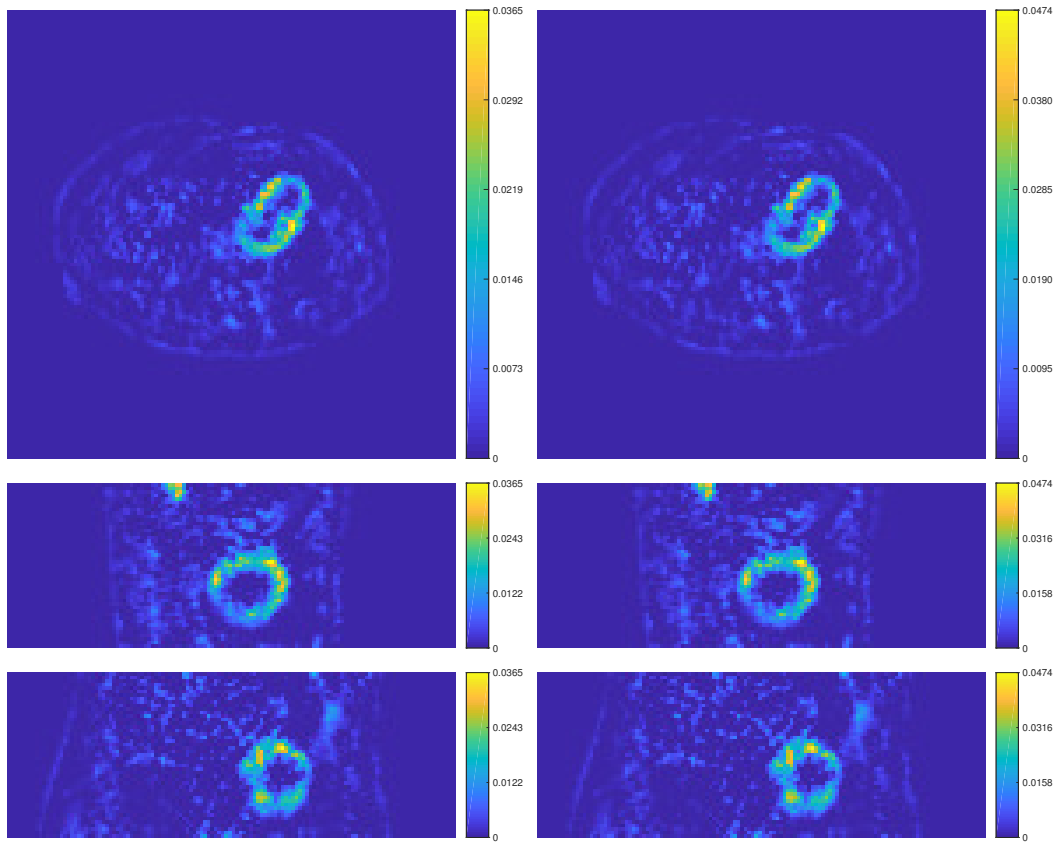

**Figure 9.** Comparison of parametric imaging using the standard Patlak plot and relative Patlak plot for the cardiac patient. Left: parametric image of  $K_i$ ; Right: parametric image of  $K'_i$ . The start time  $t^* = 30$  minutes. From the top to the bottom are the views from the planes of transverse, sagittal and coronal, respectively.

$K'_i$  images for  $t^* = 45$  minutes are shown in Fig. 11. Overall, the two images still have very similar contrast appearance, indicating the scaling relation between  $K_i$  and  $K'_i$ .

## 5. Conclusion

We propose a new relative Patlak plot method for analyzing dynamic PET data. The new plot excludes the need for early-time input function and only requires late-time input function data, thus is easier to use than the standard Patlak method. Theoretical analysis, simulation results and real patient data all have demonstrated that parametric imaging by the relative Patlak plot determines the parametric image of the standard Patlak slope up to a global scaling factor. The new relative plot can replace the standard Patlak plot for certain applications where the determination of the global scaling factor is not necessary. Examples include, but are not limited to, lesion detection (e.g., [Li et al., 2009, Yang et al., 2016]) and metabolic tumor volume segmentation (e.g., [Visser et al., 2008]) using parametric map of tracer influx rate.

The investigation and development in this work are also timely because recently whole-body Patlak parametric image reconstruction has been adopted for commercial PET scanners [Hu et al., 2017]. The new relative Patlak plot can have a clear implication for practical use.

## Relative Patlak Plot for Parametric Imaging

13

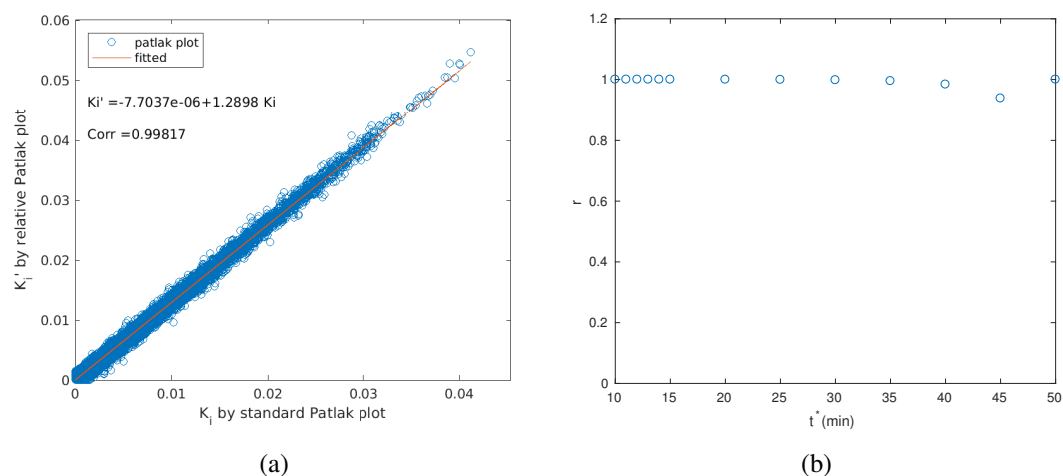

**Figure 10.** Results of the cardiac patient scan. (a) Relation between  $K_i'$  and  $K_i$  ( $t^* = 30$  minutes); (b) Correlation coefficient between  $K_i$  and  $K_i'$  versus various  $t^*$  values.

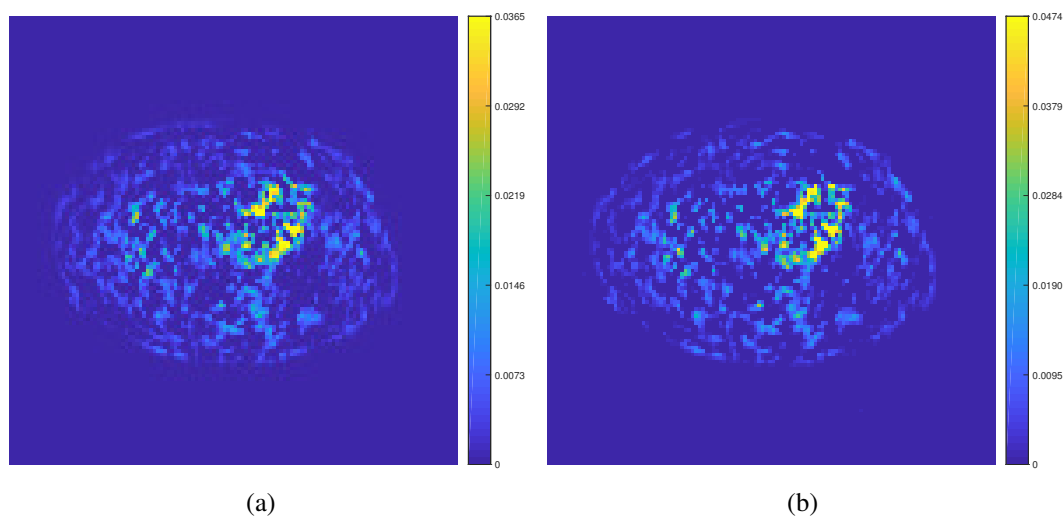

**Figure 11.** Parametric images of  $K_i$  and  $K_i'$  estimated with  $t^* = 45$  minutes for the cardiac patient data. (a)  $K_i$  by the standard Patlak plot; (b)  $K_i'$  by the relative Patlak plot.

## Acknowledgments

The work is supported in part by NIH under no. R21 HL 131385 and by AHA under no. BGIA 25780046.

## References

- [Angelis et al., 2011] Angelis, G. I., Thielemans, K., Tziortzi, A. C., Turkheimer, F. E., and Tsoumpas, C. (2011). Convergence optimization of parametric mlem reconstruction for estimation of patlak plot parameters. *Computerized Medical Imaging and Graphics*, 35(5):407–416.
- [Choi et al., 1991] Choi, Y., Hawkins, R. A., Huang, S. C., Gambhir, S. S., Brunken, R. C., Phelps, M. E., and Schelbert, H. R. (1991). Parametric images of myocardial metabolic-rate of glucose generated

- from dynamic cardiac pet and 2- f-18 fluoro-2-deoxy-d-glucose studies. *Journal of Nuclear Medicine*, 32(4):733–738.
- [Choi et al., 1993] Choi, Y., Huang, S. C., Hawkins, R. A., Kuhle, W. G., Dahlbom, M., Hoh, C. K., Czernin, J., Phelps, M. E., and Schelbert, H. R. (1993). A simplified method for quantification of myocardial blood-flow using nitrogen-13-ammonia and dynamic pet. *Journal of Nuclear Medicine*, 34(3):488–497.
- [Feng et al., 1993] Feng, D., Huang, S. C., and Wang, X. M. (1993). Models for computer-simulation studies of input functions for tracer kinetic modeling with positron emission tomography. *International Journal of Bio-Medical Computing*, 32(2):95–110.
- [Gambhir et al., 1989] Gambhir, S. S., Schwaiger, M., Huang, S. C., Krivokapich, J., Schelbert, H. R., Nienaber, C. A., and Phelps, M. E. (1989). Simple noninvasive quantification method for measuring myocardial glucose-utilization in humans employing positron emission tomography and f-18 deoxyglucose. *Journal of Nuclear Medicine*, 30(3):359–366.
- [Gill et al., 2003] Gill, S. S., Patel, N. K., Hotton, G. R., O’Sullivan, K., McCarter, R., Bunnage, M., Brooks, D. J., Svendsen, C. N., and Heywood, P. (2003). Direct brain infusion of glial cell line-derived neurotrophic factor in parkinson disease. *Nature Medicine*, 9(5):589–595.
- [Gunn et al., 1998] Gunn, R. N., Sargent, P. A., Bench, C. J., Rabiner, E. A., Osman, S., Pike, V. W., Hume, S. P., Grasby, P. M., and Lammertsma, A. A. (1998). Tracer kinetic modeling of the 5-ht1a receptor ligand carbonyl-c-11 way-100635 for pet. *Neuroimage*, 8(4):426–440.
- [Hackstein et al., 2003] Hackstein, N., Bauer, J., Hauck, E. W., Ludwig, M., Kramer, H. J., and Rau, W. S. (2003). Measuring single-kidney glomerular filtration rate on single-detector helical ct using a two-point patlak plot technique in patients with increased interstitial space. *American Journal of Roentgenology*, 181(1):147–156.
- [Hackstein et al., 2004] Hackstein, N., Wiegand, C., Rau, W. S., and Langheinrich, A. C. (2004). Glomerular filtration rate measured by using triphasic helical ct with a two-point patlak plot technique. *Radiology*, 230(1):221–226.
- [Hom et al., 2009] Hom, J., Dankbaar, J. W., Schneider, T., Cheng, S. C., Bredno, J., and Wintermark, M. (2009). Optimal duration of acquisition for dynamic perfusion ct assessment of blood-brain barrier permeability using the patlak model. *American Journal of Neuroradiology*, 30(7):1366–1370.
- [Hu et al., 2017] J Hu, V Panin, AM Smith, WH, Vijay Shah, F Kehren, and M Casey (2017), Clinical whole body CBM parametric PET with flexible scan modes, *Conference Record of IEEE Nuclear Science Symposium and Medical Imaging Conference*, 2017.
- [Karakatsanis et al., 2015] NA. Karakatsanis, Y Zhou, MA Lodge, ME Casey, RL Wahl, H Zaidi, A Rahmim, Generalized whole-body Patlak parametric imaging for enhanced quantification in clinical PET, *Physics in Medicine and Biology*, 60(22): 8643–8673.
- [Karakatsanis et al., 2016] Karakatsanis, N. A., Casey, M. E., Lodge, M. A., Rahmim, A., Zaidi, H., Whole-body direct 4D parametric PET imaging employing nested generalized Patlak expectation-maximization reconstruction, *Physics in Medicine and Biology*, 61(15): 5456–5485.
- [Kordower et al., 2000] Kordower, J. H., Emborg, M. E., Bloch, J., Ma, S. Y., Chu, Y. P., Leventhal, L., McBride, J., Chen, E. Y., Palfi, S., Roitberg, B. Z., Brown, W. D., Holden, J. E., Pyzalski, R., Taylor, M. D., Carvey, P., Ling, Z. D., Trono, D., Hantraye, P., Deglon, N., and Aebischer, P. (2000). Neurodegeneration prevented by lentiviral vector delivery of gdnf in primate models of parkinson’s disease. *Science*, 290(5492):767–773.
- [Li et al., 2009] Li Z, Li Q, Yu X, Conti PS, Leahy RM (2009), Lesion detection in dynamic FDG-PET using matched subspace detection, *IEEE Transactions on Medical Imaging*, 28(2):230–40.
- [Miles et al., 1999] Miles, K. A., Leggett, D. A. C., and Bennett, G. A. J. (1999). Ct derived patlak images of the human kidney. *British Journal of Radiology*, 72(854):153–158.
- [Patlak and Blasberg, 1985] Patlak, C. S. and Blasberg, R. G. (1985). Graphical evaluation of blood-to-brain transfer constants from multiple-time uptake data - generalizations. *Journal of Cerebral Blood Flow and Metabolism*, 5(4):584–590.
- [Patlak et al., 1983] Patlak, C. S., Blasberg, R. G., and Fenstermacher, J. D. (1983). Graphical evaluation of blood-to-brain transfer constants from multiple-time uptake data. *Journal of Cerebral Blood Flow and*

*Metabolism*, 3(1):1–7.

- [Rahmim et al, 2009] Rahmim A., Tang J., Zaidi H. (2009). Four-dimensional (4D) image reconstruction strategies in dynamic PET: beyond conventional independent frame reconstruction. *Medical Physics*, 36(8): 3654–70.
- [Reader and Verhaeghe, 2014] Reader, A. J. and Verhaeghe, J. (2014). 4D image reconstruction for emission tomography. *Physics in Medicine and Biology*, 59(22):R371–R418.
- [Schmidt and Turkheimer, 2002] Schmidt, K. C. and Turkheimer, F. E. (2002). Kinetic modeling in positron emission tomography. *Quarterly Journal of Nuclear Medicine*, 46(1):70–85.
- [Tang et al., 2010] Tang, J., Kuwabara, H., Fwong, D., and Rahmim, A. (2010). Direct 4d reconstruction of parametric images incorporating anato-functional joint entropy. *Physics in Medicine and Biology*, 55(15):4261–4272.
- [Tsoumpas et al., 2008] Tsoumpas, C., Turkheimer, F. E., and Thielemans, K. (2008). Study of direct and indirect parametric estimation methods of linear models in dynamic positron emission tomography. *Medical Physics*, 35(4):1299–1309.
- [Visser et al., 2008] Visser, E. P., Philippens, M. E. P., Kienhorst, L., Kaanders, J., Corstens, F. H. M., de Geus-Oei, L. F., and Oyen, W. J. G. (2008). Comparison of tumor volumes derived from glucose metabolic rate maps and SUV maps in dynamic f-18-FDG PET. *Journal of Nuclear Medicine*, 49(6):892–898.
- [Wang et al., 2008] Wang, G. B., Fu, L., and Qi, J. Y. (2008). Maximum a posteriori reconstruction of the Patlak parametric image from sinograms in dynamic PET. *Physics in Medicine and Biology*, 53(3):593–604.
- [Wang and Qi, 2013] Wang, G. B. and Qi, J. Y. (2013). Direct estimation of kinetic parametric images for dynamic PET. *Theranostics*, 3(10):802–815.
- [Wu and Carson, 2002] Wu Y., and Carson, R. E. (2002). Noise reduction in the simplified reference tissue model for neuroreceptor functional imaging. *Journal of Cerebral Blood Flow & Metabolism*, 22(12):1440–52.
- [Yang et al., 2016] Yang, L., G. Wang, J. Qi (2016), Theoretical analysis of penalized maximum-likelihood Patlak parametric image reconstruction in dynamic PET for lesion detection, *IEEE Transactions on Medical Imaging*, 35(4): 947–956.
- [Zhu et al., 2013] Zhu W, Li Q, Bai B, Conti PS, Leahy RM. (2014). Patlak image estimation from dual time-point list-mode PET data, *IEEE Transactions on Medical Imaging*, 33(4):913–24.
